# Supplementary material for: Electrochemical Skin Conductance by Sudoscan in Non-Dialysis Chronic Kidney Disease Patients
Source: MDPI journal article supplement (doi:10.3390/jcm13010187), 2023-12-28
Supplement: s1 [file s1]

Supplementary Table S1. Odds ratios (95% CI) according to univariate and multivariate logistic regression analyses of risk factors associated with pathological hands and feet ESC

| Variables                | Pathological hands ESC |                    |                    | Pathological feet ESC |                    |                    |
|--------------------------|------------------------|--------------------|--------------------|-----------------------|--------------------|--------------------|
|                          | Univariate             | Multivariate       |                    | Univariate            | Multivariate       |                    |
|                          |                        | Model 1            | Model 2            |                       | Model 1            | Model 2            |
| Age (years)              | 1.05 (1.03, 1.06)*     | 1.04 (1.03, 1.06)* | 1.05 (1.03, 1.06)* | 1.05 (1.03, 1.06)*    | 1.04 (1.03, 1.06)* | 1.05 (1.03, 1.07)* |
| DM, n (%)                | 1.52 (1.12, 2.06)*     | 1.56 (1.12, 2.17)* | 1.53 (1.07, 2.18)* | 2.21 (1.60, 3.04)*    | 2.21 (1.57, 3.13)* | 2.38 (1.64, 3.46)* |
| BMI (kg/m <sup>2</sup> ) | 0.94 (0.91, 0.98)*     | 0.94 (0.91, 0.98)* | 0.97 (0.93, 1.01)  | 0.97 (0.94, 1.01)     | 0.97 (0.93, 1.01)  | 0.99 (0.95, 1.03)  |
| CKD stages               |                        |                    |                    |                       |                    |                    |
| CKD stage 1-2            | 1.00 (reference)       | 1.00 (reference)   | 1.00 (reference)   | 1.00 (reference)      | 1.00 (reference)   | 1.00 (reference)   |
| CKD stage 3              | 1.91 (1.24, 2.96)*     | 1.44 (0.90, 2.29)  | 1.06 (0.62, 1.82)  | 1.86 (1.17, 2.96)*    | 1.48 (0.90, 2.44)  | 0.93 (0.53, 1.63)  |
| CKD stage 4-5            | 2.32 (1.49, 3.63)*     | 1.62 (1.00, 2.61)* | 0.70 (0.37, 1.30)  | 2.46 (1.54, 3.94)*    | 1.75 (1.05, 2.90)  | 0.61 (0.32, 1.18)  |
| Hb (g/dL)                | 0.81 (0.75, 0.87)*     | -                  | 0.85 (0.76, 0.94)* | 0.83 (0.77, 0.90)*    | -                  | 0.87 (0.78, 0.98)* |
| Albumin (g/dL)           | 0.31 (0.20, 0.48)*     | -                  | 0.50 (0.29, 0.85)* | 0.29 (0.19, 0.45)*    | -                  | 0.41 (0.24, 0.71)* |
| UPCR (g/g)               | 1.10 (1.02, 1.18)*     | -                  | 1.08 (1.00, 1.17)  | 1.12 (1.04, 1.20)*    | -                  | 1.07 (0.99, 1.16)  |

A pathological ESC was defined by a hands ESC value of < 40  $\mu$ S or a feet ESC value of < 50  $\mu$ S.

Model 1 was adjusted for age, gender, diabetes mellitus, hypertension, body mass index and CKD stages. Model 2 was further adjusted for hemoglobin, albumin and UPCR.

CI, confidence interval; ESC, electrochemical skin conductance; DM, diabetes mellitus; BMI, body mass index; CKD, chronic kidney disease; Hb, hemoglobin; UPCR, urine protein to creatinine ratio.

\* $p < 0.05$ .

Supplementary Table S2. Odds ratios (95% CI) according to univariate and multivariate logistic regression analyses of risk factors associated with pathological hands and feet ESC in DM and non-DM patients

| DM (n= 344)              |                        |                    |                    |                       |                    |                    |
|--------------------------|------------------------|--------------------|--------------------|-----------------------|--------------------|--------------------|
| Variables                | Pathological hands ESC |                    |                    | Pathological feet ESC |                    |                    |
|                          | Univariate             | Multivariate       |                    | Univariate            | Multivariate       |                    |
|                          |                        | Model 1            | Model 2            |                       | Model 1            | Model 2            |
| Age (years)              | 1.03 (1.01, 1.05)*     | 1.02 (1.00, 1.04)  | 1.02 (1.00, 1.05)  | 1.02 (1.00, 1.04)     | 1.01 (0.99, 1.03)  | 1.01 (0.99, 1.04)  |
| BMI (kg/m <sup>2</sup> ) | 0.94 (0.89, 0.99)*     | 0.95 (0.90, 1.00)  | 0.97 (0.92, 1.03)  | 0.95 (0.90, 1.00)*    | 0.96 (0.91, 1.01)  | 0.97 (0.91, 1.02)  |
| CKD stages               |                        |                    |                    |                       |                    |                    |
| CKD stage 1-2            | 1.00 (reference)       | 1.00 (reference)   | 1.00 (reference)   | 1.00 (reference)      | 1.00 (reference)   | 1.00 (reference)   |
| CKD stage 3              | 1.58 (0.87, 2.87)      | 1.38 (0.75, 2.56)  | 0.73 (0.35, 1.55)  | 2.04 (1.10, 3.80)*    | 1.91 (1.01, 3.59)* | 0.85 (0.40, 1.78)  |
| CKD stage 4-5            | 2.57 (1.43, 4.63)*     | 2.14 (1.16, 3.95)* | 0.61 (0.26, 1.47)  | 3.05 (1.66, 5.61)*    | 2.70 (1.44, 5.08)* | 0.60 (0.25, 1.44)  |
| Hb (g/dL)                | 0.81 (0.73, 0.89)*     | -                  | 0.84 (0.72, 0.98)* | 0.83 (0.75, 0.92)*    | -                  | 0.89 (0.76, 1.03)  |
| Albumin (g/dL)           | 0.20 (0.10, 0.39)*     | -                  | 0.32 (0.14, 0.70)* | 0.18 (0.09, 0.36)*    | -                  | 0.22 (0.10, 0.51)* |
| UPCR (g/g)               | 1.12 (1.02, 1.23)*     | -                  | 1.06 (0.96, 1.16)  | 1.16 (1.05, 1.28)*    | -                  | 1.04 (0.95, 1.15)  |
| Non-DM (n= 356)          |                        |                    |                    |                       |                    |                    |
| Variables                | Pathological hands ESC |                    |                    | Pathological feet ESC |                    |                    |
|                          | Univariate             | Multivariate       |                    | Univariate            | Multivariate       |                    |
|                          |                        | Model 1            | Model 2            |                       | Model 1            | Model 2            |
| Age (years)              | 1.07 (1.04, 1.09)*     | 1.06 (1.04, 1.09)* | 1.06 (1.04, 1.09)* | 1.09 (1.06, 1.12)*    | 1.09 (1.06, 1.12)* | 1.08 (1.05, 1.12)* |
| BMI (kg/m <sup>2</sup> ) | 0.93 (0.88, 0.98)*     | 0.92 (0.86, 0.98)* | 0.94 (0.88, 1.01)  | 0.97 (0.92, 1.03)     | 0.97 (0.90, 1.04)  | 0.99 (0.92, 1.07)  |
| CKD stages               |                        |                    |                    |                       |                    |                    |
| CKD stage 1-2            | 1.00 (reference)       | 1.00 (reference)   | 1.00 (reference)   | 1.00 (reference)      | 1.00 (reference)   | 1.00 (reference)   |
| CKD stage 3              | 2.52 (1.30, 4.89)*     | 1.33 (0.64, 2.76)  | 1.29 (0.56, 2.95)  | 1.98 (0.96, 4.09)     | 0.86 (0.38, 1.96)  | 0.77 (0.31, 1.93)  |
| CKD stage 4-5            | 2.05 (1.01, 4.13)*     | 1.05 (0.48, 2.31)  | 0.67 (0.25, 1.78)  | 1.82 (0.84, 3.92)     | 0.76 (0.32, 1.84)  | 0.46 (0.16, 1.37)  |
| Hb (g/dL)                | 0.82 (0.73, 0.91)*     | -                  | 0.85 (0.73, 1.00)* | 0.83 (0.74, 0.93)*    | -                  | 0.83 (0.70, 0.99)* |
| Albumin (g/dL)           | 0.48 (0.26, 0.87)*     | -                  | 0.66 (0.29, 1.50)  | 0.47 (0.25, 0.89)*    | -                  | 0.65 (0.27, 1.60)  |
| UPCR (g/g)               | 1.00 (0.86, 1.15)      | -                  | 1.04 (0.86, 1.25)  | 0.92 (0.77, 1.11)     | -                  | 0.96 (0.76, 1.20)  |

A pathological ESC was defined by a hands ESC value of < 40 µS or a feet ESC value of < 50 µS.

Model 1 was adjusted for age, gender, diabetes mellitus, hypertension, body mass index and CKD stages. Model 2 was further adjusted for hemoglobin, albumin and UPCR.

CI, confidence interval; ESC, electrochemical skin conductance; DM, diabetes mellitus; BMI, body mass index; CKD, chronic kidney disease; Hb, hemoglobin; UPCR, urine protein to creatinine ratio.

\* $p < 0.05$ .
